# Supplementary material for: Physiological Responses to Salt Stress at the Seedling Stage in Wild (Oryza rufipogon Griff.) and Cultivated (Oryza sativa L.) Rice
Source: MDPI journal article supplement (doi:10.3390/plants13030369), 2024-01-26
Supplement: s1 [file s1]

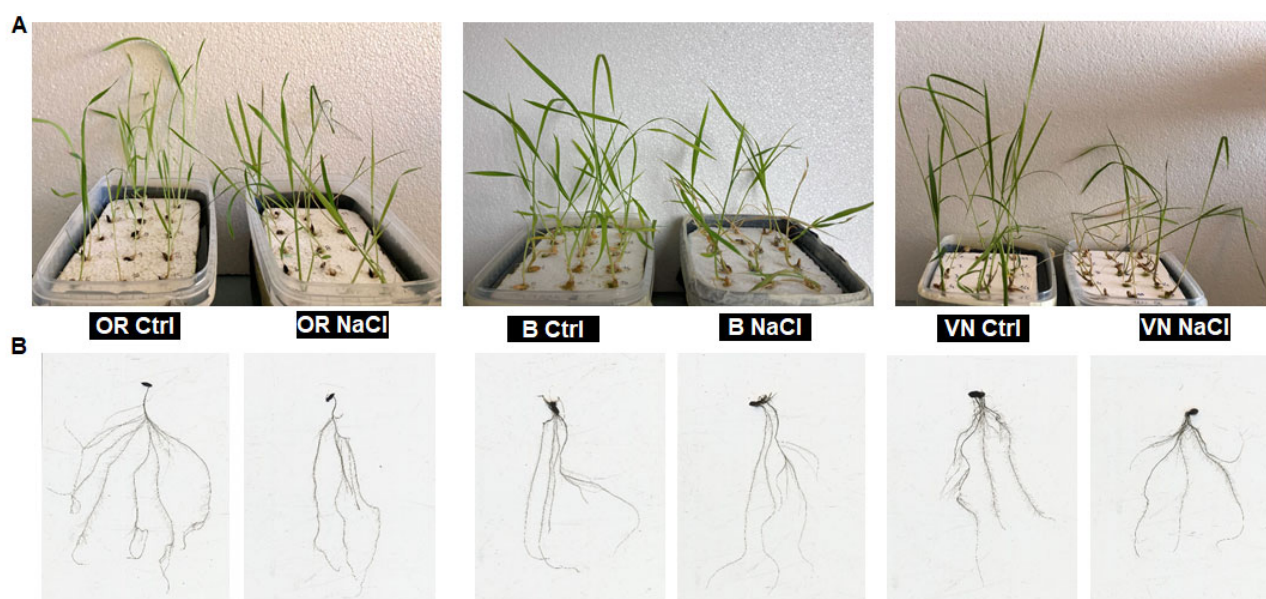

**Figure S1.** Visual symptoms of salt stress injuries at shoot and root level. Visual symptoms of salt stress injuries after 7 days of exposure to 80 mM NaCl (NaCl) on shoots (**A**) and roots (**B**) of *O. rufipogon* (OR), *O. sativa* var. Baldo (B) and *O. sativa* var. Vialone Nano (VN) with respect to their counterparts from plants grown in control conditions (Ctrl).

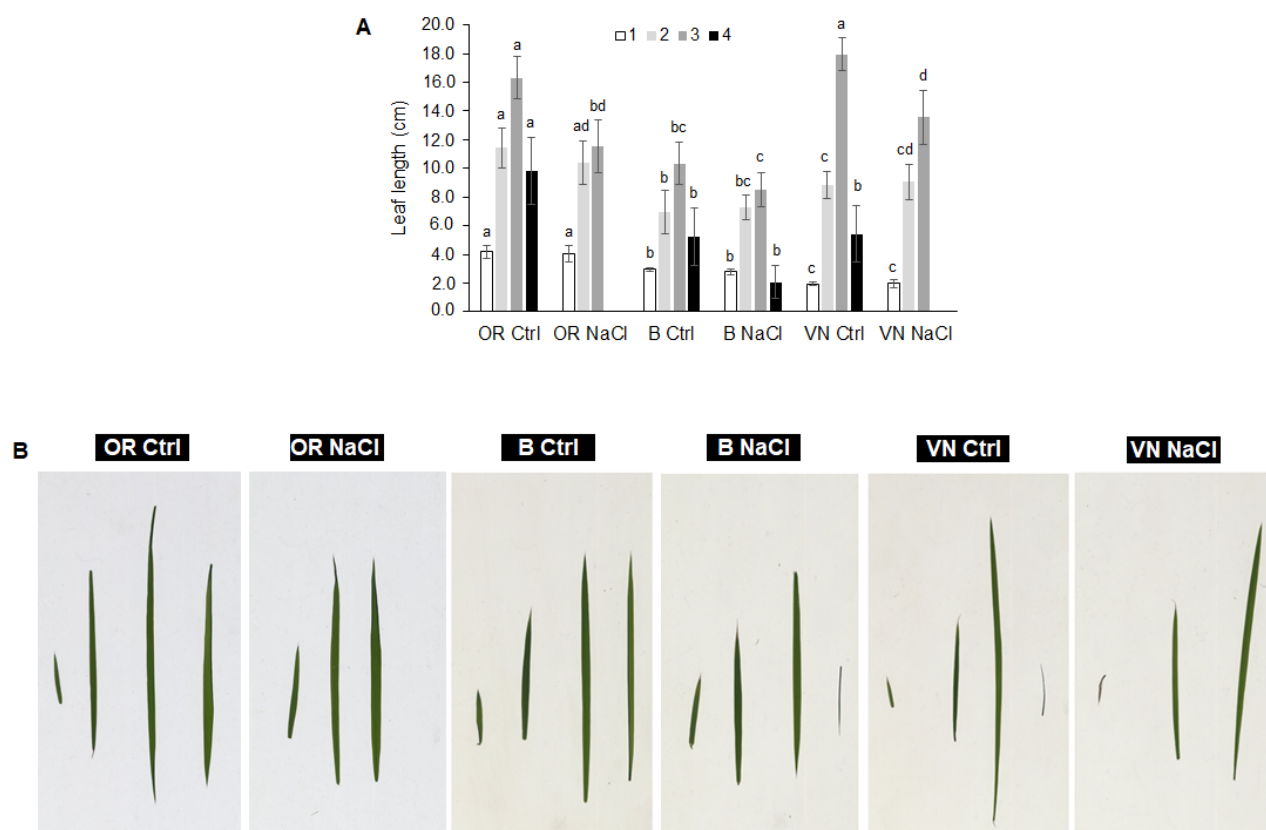

**Figure S2.** Effect of salt stress on leaf length (1, first; 2, second; 3, third; 4, fourth leaf) evaluated in *O. rufipogon* (OR), *O. sativa* var. Baldo (B) and *O. sativa* var. Vialone Nano (VN) after 7 days of exposure to 80 mM NaCl (NaCl) with respect to their counterparts from plants grown in control conditions (Ctrl) (A) and corresponding pictures (B). In panel B, leaves are in the order from the first to the fourth starting from the left to the right. Data are the means  $\pm$  standard deviations of at least eight replicates. For each trait, different letters indicate significant difference determined by One-Way ANOVA with Tukey's test ( $p < 0.05$ ).
